# Supplementary material
Source: Springer Nature journal article supplement (https://www.springermedizin.de/resource/supplementary/12986_2007_112_MOESM3_ESM.pdf/25655386)

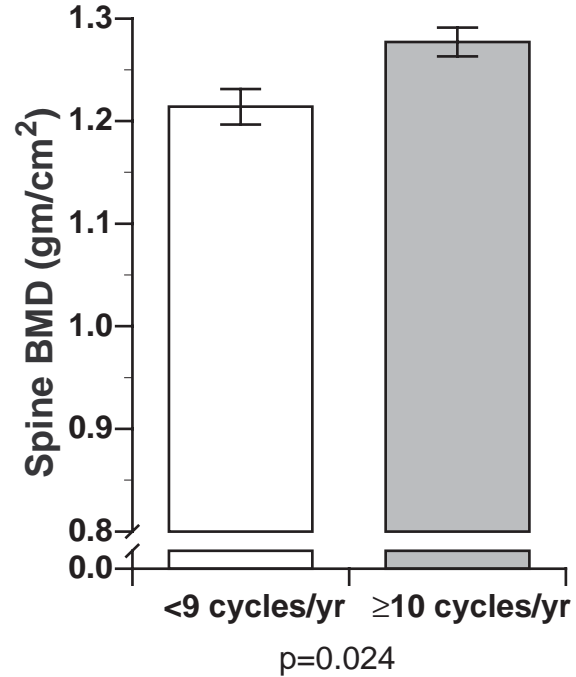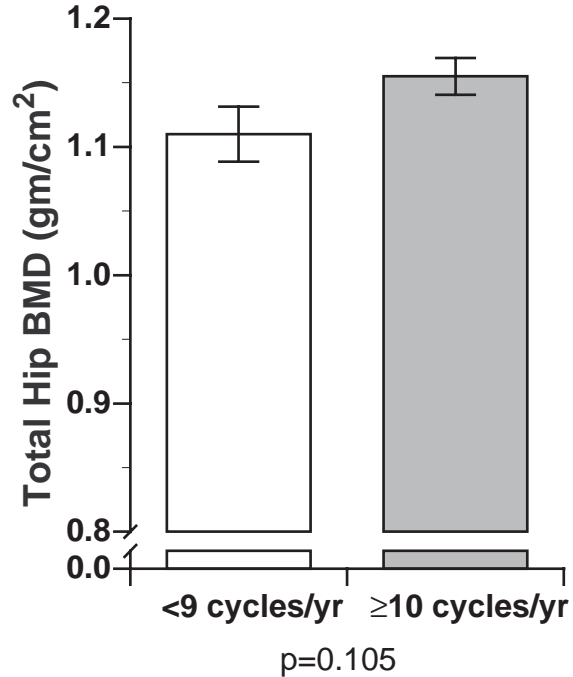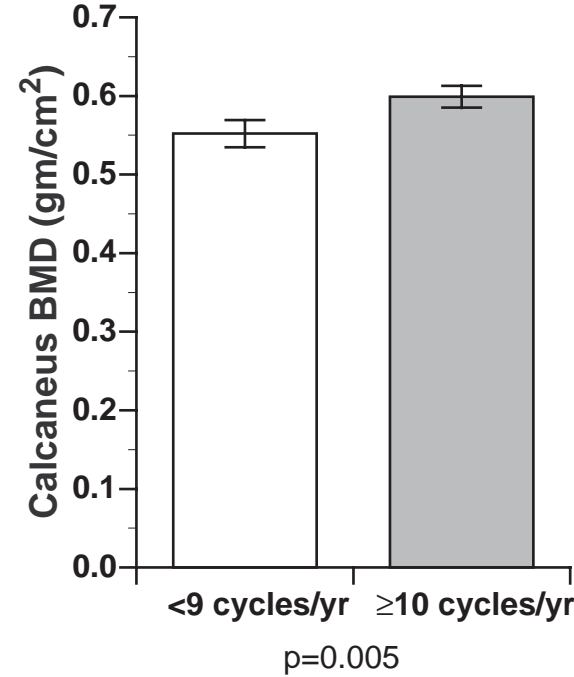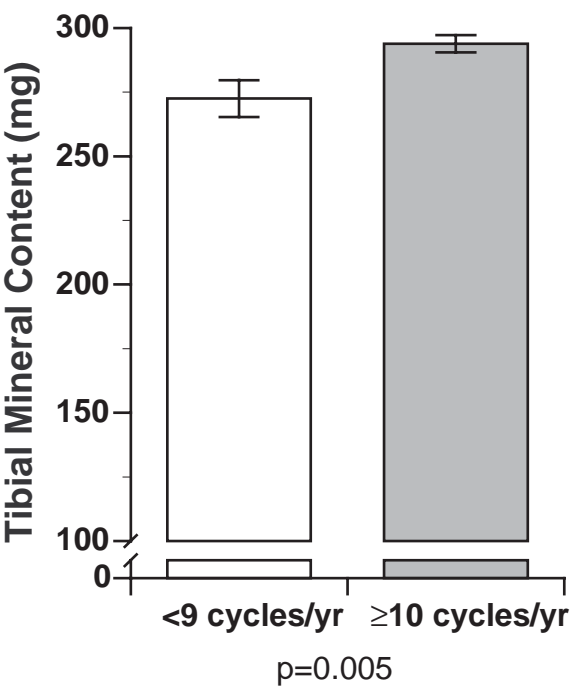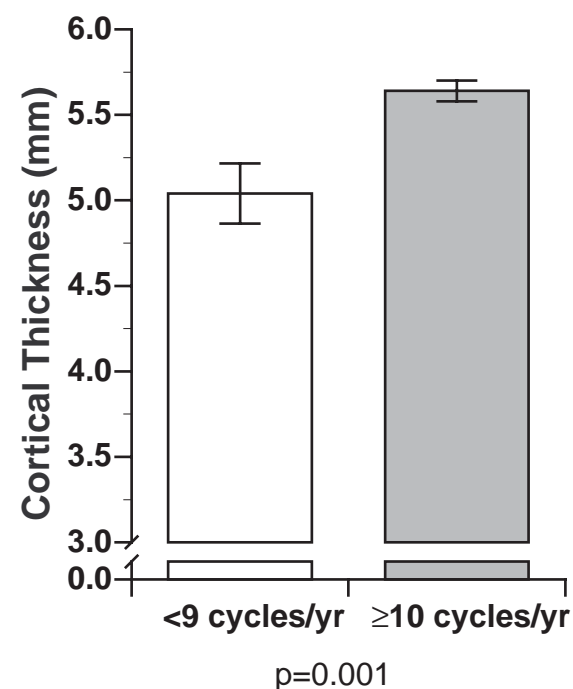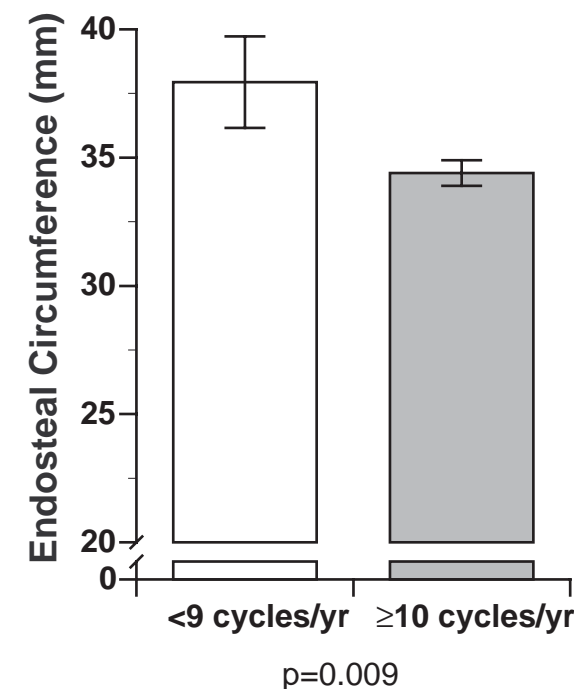

Supplement: MOESM3 [file 25655386]
